# Supplementary material
Source: HighWire-hosted journal article supplement (https://www.cmaj.ca/highwire/filestream/151090/field_highwire_adjunct_files/2/231547-res-3-at.pdf)

**Online Appendix 3, Figure S1. Temporal trends in the rates of hypertensive disorders of pregnancy (HDP) and their sub-types by province and territory in Canada (excluding Quebec), 2012 to 2021\***

\*Autoregressive integrated moving average (ARIMA) modelling was carried out for each type of HDP. Although yearly rates are presented in each figure, monthly HDP rates were analyzed in the ARIMA models.

### Newfoundland and Labrador

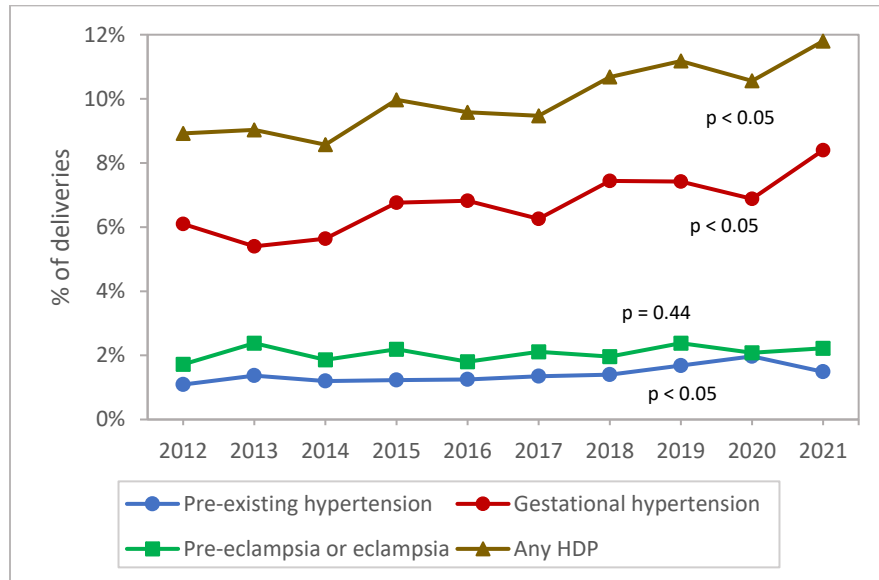

### Prince Edward Island

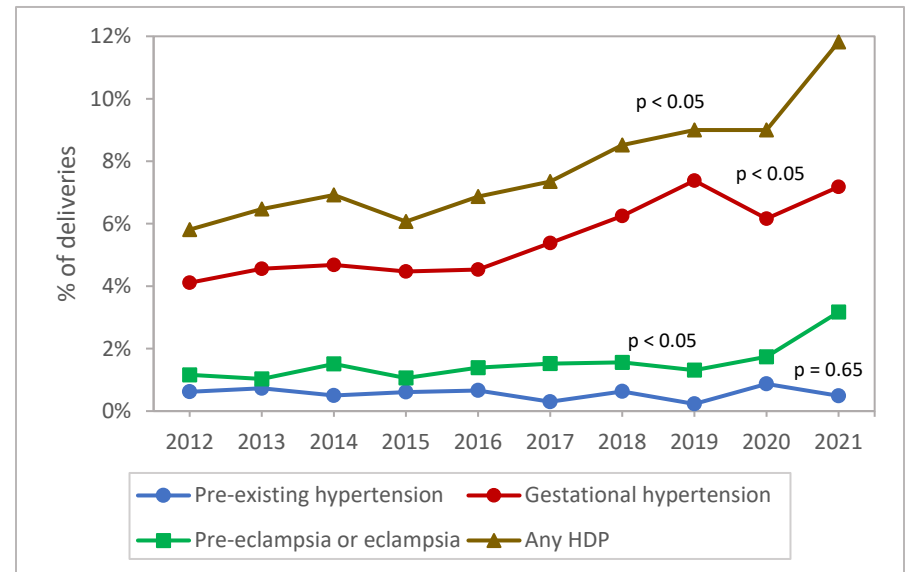

### Nova Scotia

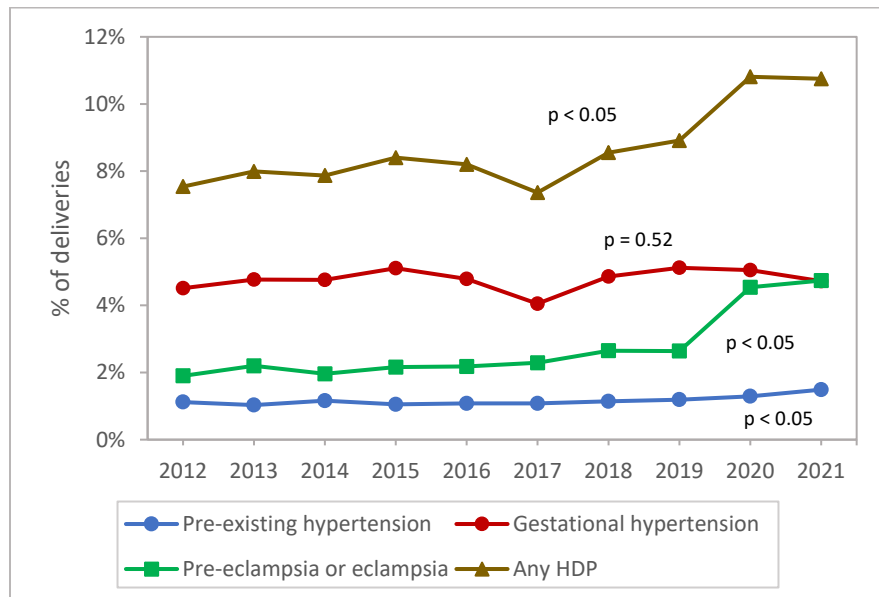

### New Brunswick

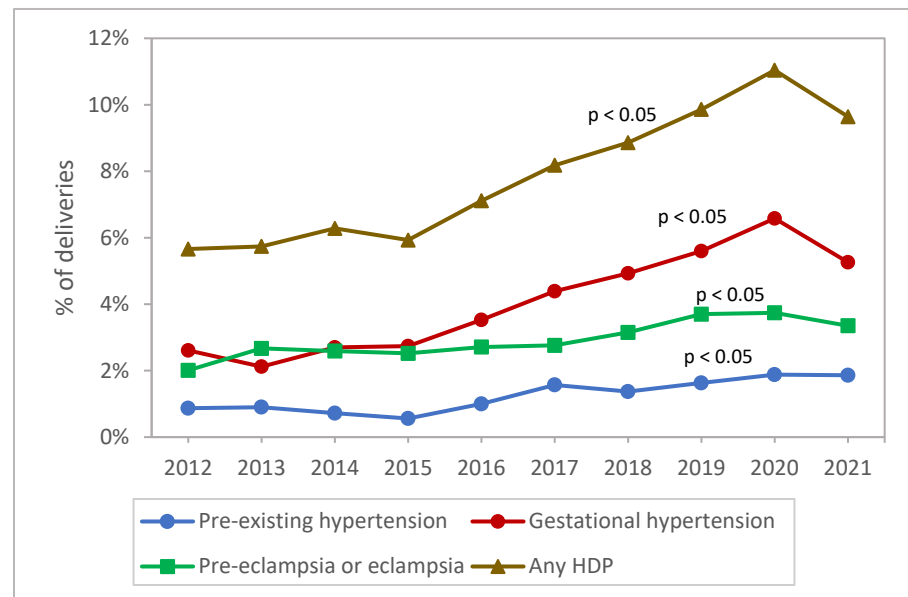

### Ontario

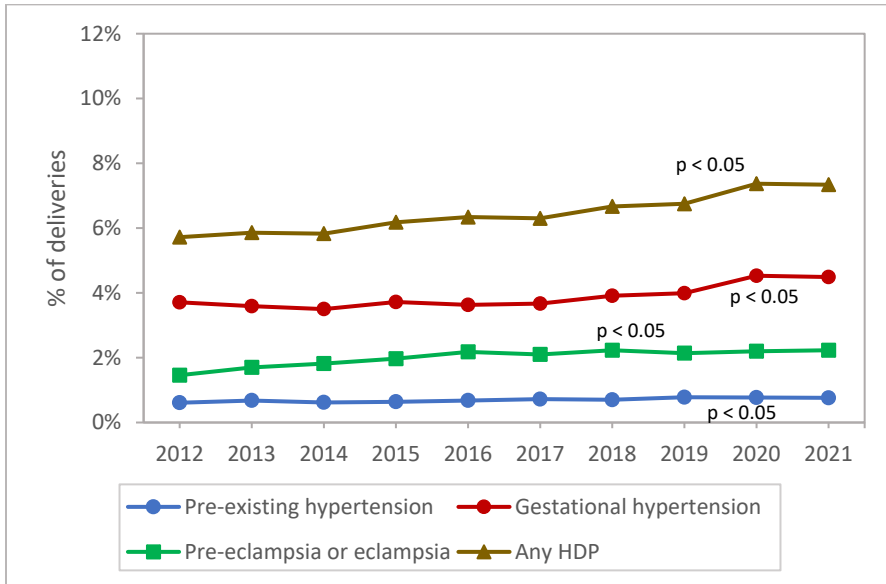

### Manitoba

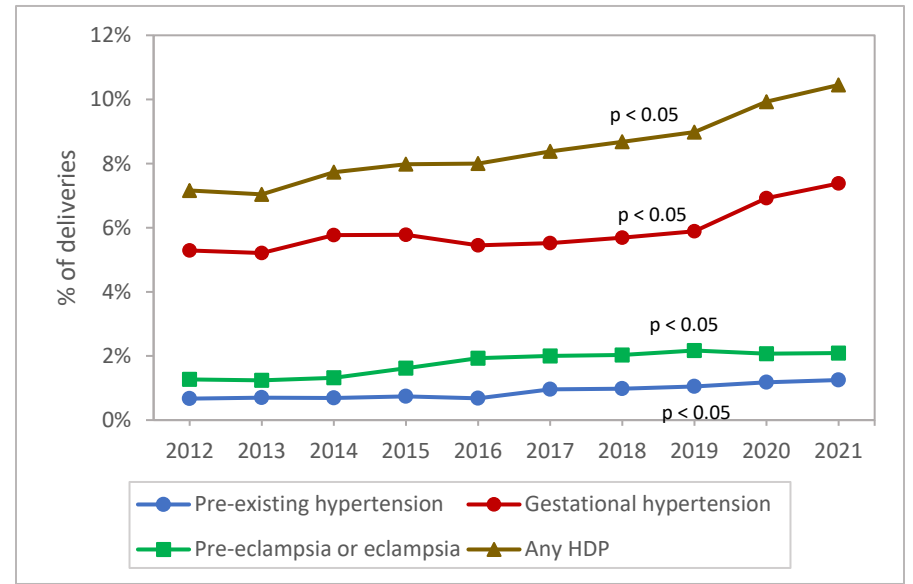

### Saskatchewan

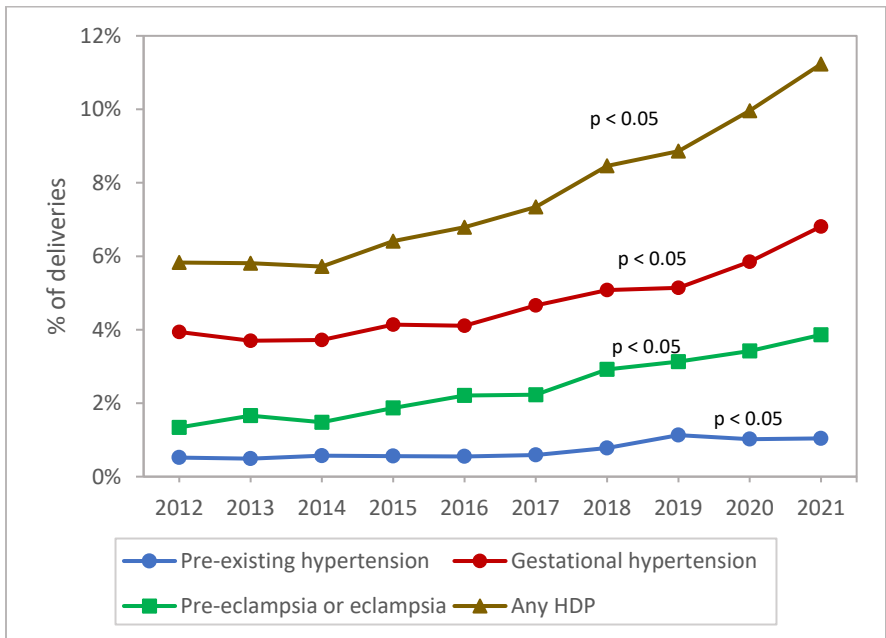

### Alberta

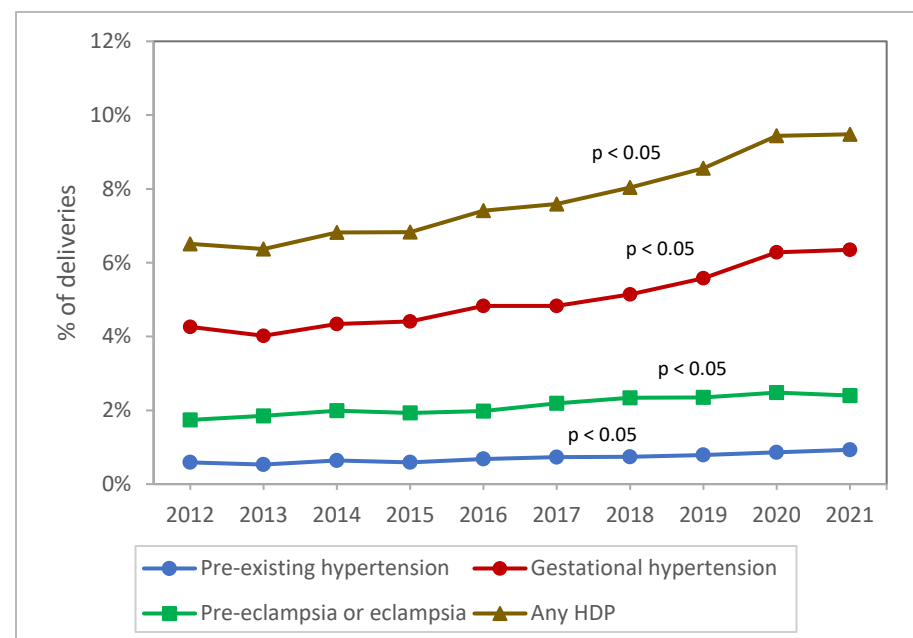

### British Columbia

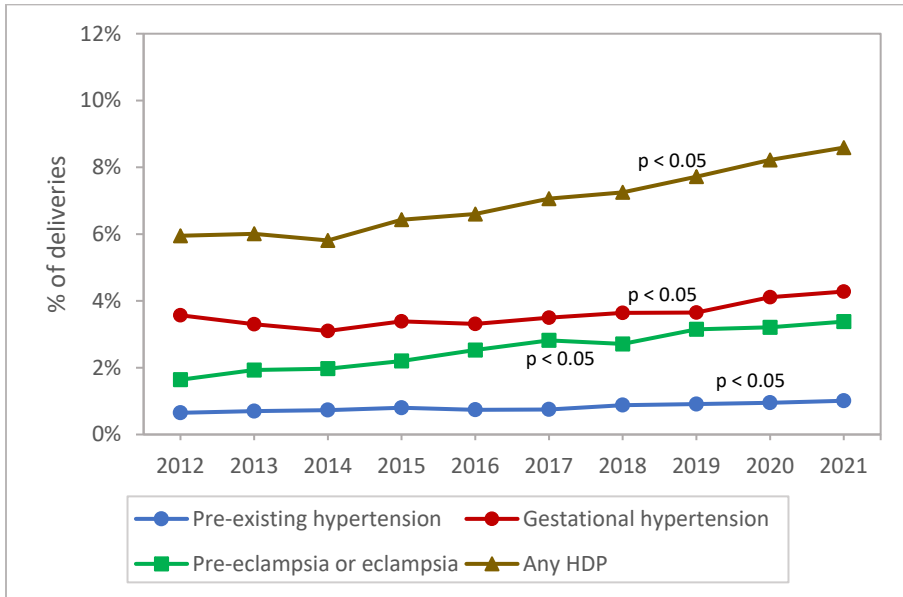

### Northwest Territories

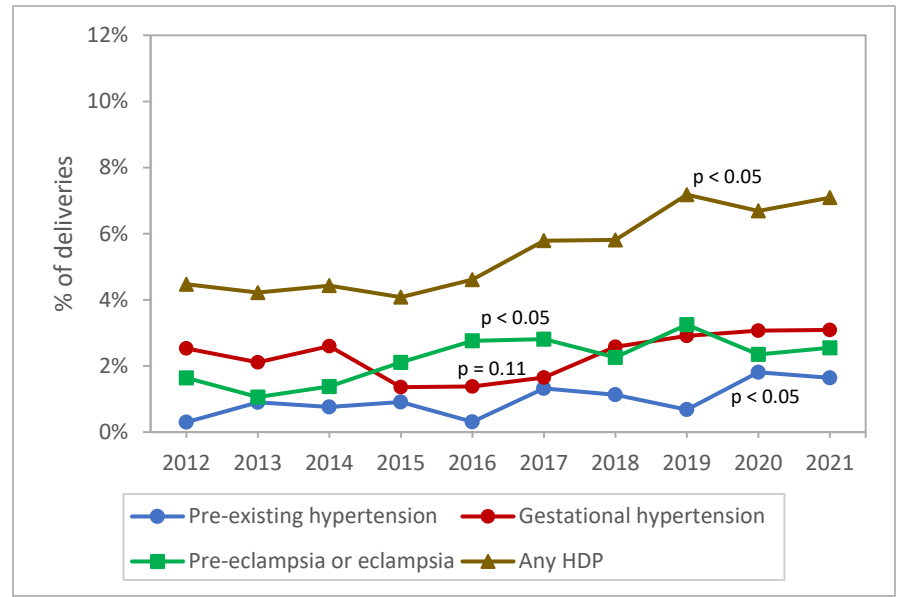

### Nunavut

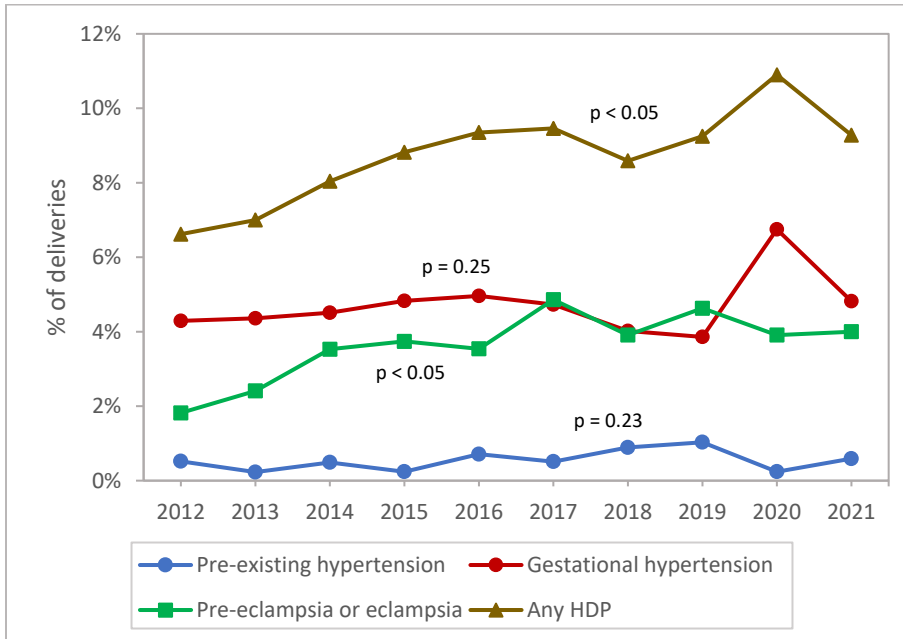

### Yukon

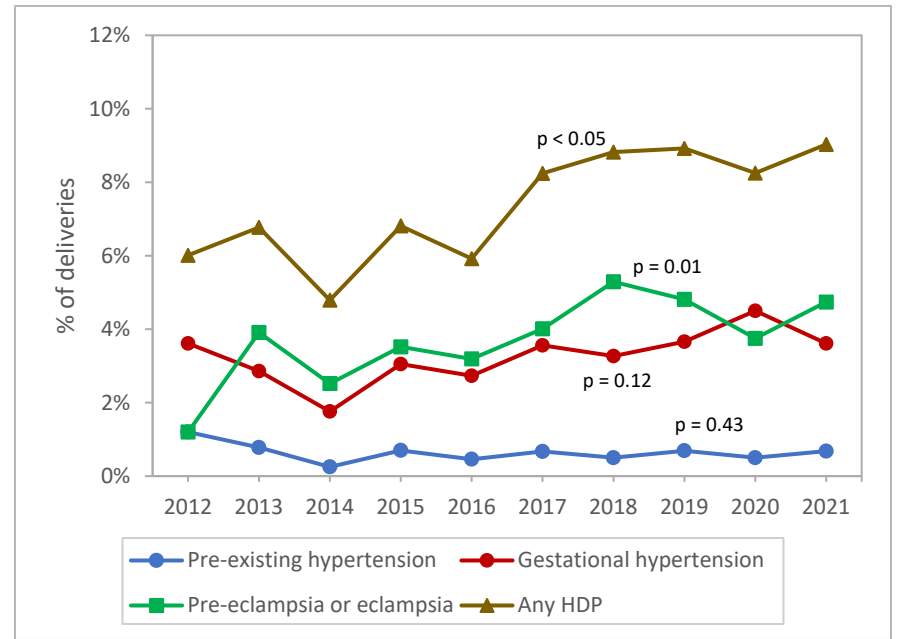

### Northwest Territories, Nunavut and Yukon combined

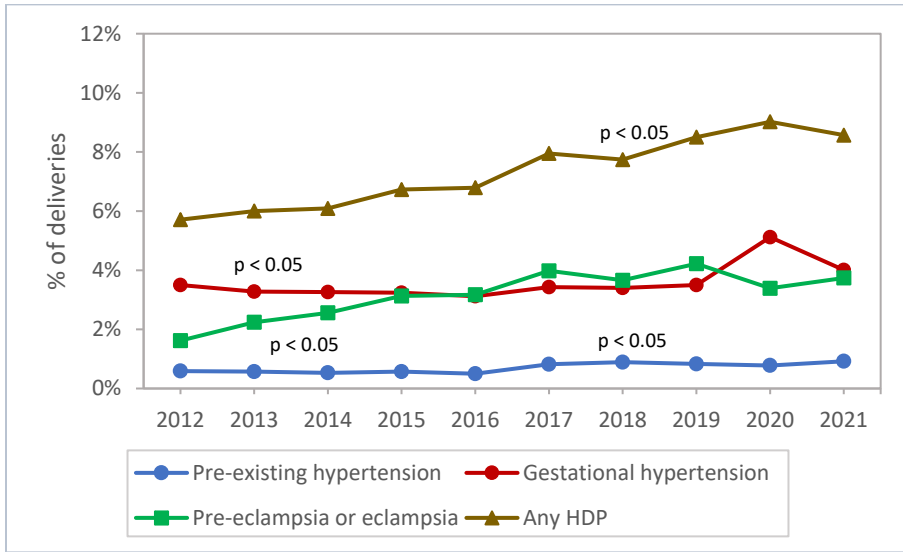

Supplement: 231547-res-3-at.pdf [file 231547-res-3-at.pdf]
